## Review Article

# Adjuvant and neoadjuvant therapy for breast cancer

Tadahiko Shien<sup>1,2,\*</sup>, and Hiroji Iwata<sup>1,2</sup>

<sup>1</sup>Department of Breast and Endocrine Surgery, Okayama University Hospital, Okayama, Japan, and <sup>2</sup>Department of Breast Oncology, Aichi Cancer Center, Nagoya, Japan.

\*For reprints and all correspondence: Tadahiko Shien, Department of Breast and Endocrine Surgery, Okayama University, Hospital, 2-5-1 Shikata-cho, Kita-ku, Okayama 7008558, Japan. E-mail: tshien@md.okayama-u.ac.jp

Received 6 October 2019; Editorial Decision 7 December 2019; Accepted 8 December 2019

### Abstract

Systemic therapies for operable breast cancer patients have improved outcomes and have thus become standard treatments. Recently, new molecular target drugs and regimens are being developed based on the predicted sensitivity for specific breast cancer histological types. Systemic therapy is selected according to recurrence risk, with the treatment for low-risk patients being de-escalated, while high-risk patients receive aggressive systemic treatment with an adequate dose and duration. Neoadjuvant systemic therapy has a different aim. The efficacy of systemic therapies, based on the sensitivities to drugs, is supported by improvements in the rate of breast-conserving therapy. The response to neoadjuvant systemic therapy is the most important factor for predicting outcomes and selecting the optimal adjuvant therapy. Novel biological markers unique to individual patients allow appropriate targeted therapy, which can achieve optimal efficacy.

**Key words:** breast cancer, adjuvant, neoadjuvant

### Introduction

The multidisciplinary treatments for patients with operable breast cancer (BC) combine local, i.e. surgical and radiation therapies, with systemic treatments including a wide range of drugs. Systemic therapy especially is very important for improving disease-free survival (DFS) based on the control of micro-metastases with the potential to spread throughout the body. Predicting responses and determining the sensitivity of tumors to drugs are necessary for selecting the optimal treatment regimen. The systemic therapy is decided according to shared decision-making between patients and investigators based on benefits and risk such as adverse events. Costs must also be factored into these decisions.

The timing of systemic therapies for operable BC includes adjuvant therapy after surgery and neoadjuvant therapy before surgery. The efficacies of these therapies for improving DFS are essentially the same, if similar drugs and regimens are used based on previous studies (1). The drugs given as systemic therapy are classified into hormone therapy, chemotherapy and molecular target therapy. These drugs can be given alone, as a single agent, or used in multiple-drug regimens.

BC is divided into subtypes according to the expression of biological markers, mainly the estrogen receptor (ER), progesterone receptor (PgR), human epidermal growth factor receptor 2 (HER2) and Ki67. The definitions of luminal A like, luminal B like, HER2 enrich and triple negative type are ER-positive and Ki67 low, ER-positive and Ki67 high, HER2 positive and all negative (ER, PgR, HER2), respectively. This subtype classification is very useful for selecting the most appropriate systemic therapy. Endocrine therapies and anti-HER2 therapies are effective for BC with ER-positive and HER2-positive, respectively.

### Adjuvant systemic therapy

The aim of adjuvant systemic therapy is to prolong survival by treating latent micro-metastases. Endocrine therapy, chemotherapy and anti-HER2 therapy based on different anti-cancer mechanisms can improve both DFS and overall survival (OS). The selection of these drugs is determined according to shared decision-making between patients and investigators based on baseline risk, which estimated by a number of lymph node metastases, invasive tumor

**Table 1.** Adjuvant systemic therapy for early breast cancer

| Therapy           | Biology                               | Regimen                                                                              |
|-------------------|---------------------------------------|--------------------------------------------------------------------------------------|
| Hormone therapy   | ER- and/or PgR-positive premenopause  | TAM 10 (5) years,<br>TAM + LH–RH agonist 5 years,<br>EXE + LH–RH agonist 5 years     |
|                   | ER- and/or PgR-positive postmenopause | AI 5 (10) years.                                                                     |
| Anti-HER2 therapy | HER2-positive                         | Chemotherapy + Trastuzumab 1 year,<br>Chemotherapy + Trastuzumab + Pertuzumab 1 year |
| Chemotherapy      | Any                                   | Anthracycline and/or taxane (+/–) capecitabine                                       |

TAM; tamoxifen, AI; aromatase inhibitor.

size, histological grade and molecular subtypes. Recently, the Ki-67 (1–3) expression score and multi-gene assay results (4–6) for cancer cells have been used to predict a benefit of chemotherapy for ER-positive BC patients (Table 1).

### Adjuvant hormone therapy for ER-positive BC patients

Premenopausal patients with ER-positive BC are given tamoxifen (selective estrogen modulator, SERM) as hormone therapy (7). Tamoxifen reduces the risk of recurrence and death, regardless of age, menopausal status, lymph node metastasis and the use of chemotherapy.

Tamoxifen administration should be continued for 10 years (8). Tamoxifen, administered for a decade, can reduce BC-related deaths by 2.8% as compared to treatment for 5 years according to the ATLAS trial<sup>ix</sup>. Adding a luteinizing hormone-releasing hormone (LH–RH) agonist, which induces amenorrhea, to tamoxifen or exemestane [aromatase inhibitor (AI)] is recommended as adjuvant therapy for young patients and those at high risk for recurrence receiving adjuvant chemotherapy (9–11).

An increased risk of endometrial cancer is an adverse event specific to tamoxifen when taken by postmenopausal patients aged 54 years and older (12).

Taking an AI for 5 years is recommended as adjuvant hormone therapy for postmenopausal BC patients (13,14). Postmenopausal patients with high-risk BC especially need to take an AI for 10 years. The EBCTCG (Early Breast Cancer Trialists' Collaborative Group) meta-analysis reported that AI can reduce recurrence by 30% and death by 15% as compared with tamoxifen (15). The MA-17 trial revealed DFS to be significantly longer with 10 years than with 5 years of AI (16). However, there were significantly more bone-related adverse events (fracture, pain and osteoporosis) with longer AI administration. Tamoxifen is an alternative for patients suffering serious adverse events associated with AI.

Prospective randomized trials to confirm the efficacy of CDK 4/6 inhibitors, which can overcome hormone resistance, are currently ongoing.

Adjuvant hormone therapy can not only improve DFS but also prevent the occurrence of ipsilateral breast tumor. Adverse events related to endocrine therapies are also factors, which should consider due to determine treatment regimens.

### Adjuvant chemotherapy for high-risk BC patients

BC patients with axillary lymph node metastases or high risk for recurrence should receive chemotherapy such as anthracycline (A) containing regimen or TC regimen (docetaxel and cyclophosphamide) or AC followed by taxane (docetaxel or paclitaxel) regimen as adjuvant chemotherapy (17). The efficacy of the TC regimen was confirmed in a prospective randomized trial (18,19). Chronic heart failure is one of the important adverse events associated with A administration. Dose-dense therapy, which shortens the treatment duration, can significantly improve both DFS and OS as compared with standard A containing regimens followed by a taxane. G-CSF support has been needed and severe anemia has been needed attention (20,21). Capecitabine is recommended a usage for TN BC with residual disease after neoadjuvant systemic therapy based on previous clinical trial (22). To optimize the administration of adjuvant chemotherapy, the recurrence score based on a multi-gene panel examination of cancer tissue (Oncotype DX, MammaPrint, PAM 50, Curebest) (Table 2) is useful (23–25). Chemotherapy is not recommended for early BC patients with low RS by Oncotype DX based on clinical trial (26). Trials to confirm the prognostic performance of PARP (poly ADP ribose polymerase) inhibitors, which exert a synthetic lethality in the setting of BRCA mutations, are currently ongoing (Table 3).

### Adjuvant anti-HER2 therapy for HER2-positive BC patients

Trastuzumab, which is an anti-HER2 molecular target therapy, in combination with adjuvant chemotherapy is recommended for patients with HER2-positive cancer and those with breast tumors larger than 1 cm (27). Trastuzumab should not be used simultaneously with AC because heart failure is an adverse event associated with both drugs. Trastuzumab monotherapy without chemotherapy is not recommended, due to a lack of evidence supporting the efficacy of this drug given alone. For patients with small tumors, i.e. from 0.5 to 1 cm in largest diameter, the decision to administer trastuzumab is made in consideration of both risks and benefits. There is prospective data indicating the efficacy of adjuvant weekly paclitaxel with trastuzumab for low-risk HER2-positive BC (28). For high-risk patients with node positive cancer, pertuzumab, which is another anti-HER2 molecular target therapy, is added to trastuzumab (29). Pertuzumab has been found to improve DFS in patients with invasive disease without increasing the incidence of adverse events. The optimal duration of anti-HER2 drug administration is one year (30,31). One dataset showed 1-year treatment with neratinib after trastuzumab to improve DFS. Whether to administer neratinib should be decided taking recurrence risk, adverse events and high costs into consideration. T-DM1 (trastuzumab emtansine) is recommended a usage for HER2-positive BC with residual disease after neoadjuvant systemic therapy based on previous clinical trial (32).

**Table 2.** The new drug being confirmed the efficacy by ongoing adjuvant trial for breast cancer

| subtype                   | Drug (study name)        |                        |                                |                     |
|---------------------------|--------------------------|------------------------|--------------------------------|---------------------|
| ER-positive               | Pembrolizumab (Keynote)  | Abemaciclib (MONARCHE) | Palbociclib (PENELOPE, PALLAS) | Olaparib (Olympi A) |
| ER-negative HER2-positive | T-DM1 (Kaitlin)          |                        |                                |                     |
| Triple negative           | Atezolizumab (Impassion) | Olaparib (Olympi A)    |                                |                     |

**Table 3.** Multigene assay for breast cancer

|             | Company          | Gene | Method     | Prospective trial |
|-------------|------------------|------|------------|-------------------|
| Oncotype DX | Genomic Health   | 21   | RT-PCR     | TAILORx           |
| MammaPrint  | Agendia          | 70   | Microarray | MINDACT           |
| PAM 50      | Nanostring Tech. | 50   | RT-PCR     |                   |
| Curebest    | Sysmex           | 95   | Microarray |                   |

RT-PCR, real-time polymerase chain reaction.

### Adjuvant therapy with bone modifying agents

Bisphosphonate as adjuvant systemic therapy is reportedly effective in postmenopausal and premenopausal patients receiving LH–RH agonist therapy. The EBCTCG meta-analysis indicated that bisphosphonate reduces the incidence of bone metastasis, suppresses distant metastasis and improves OS (33). However, the risk of bone fracture is lessened only for postmenopausal patients. As yet, we have no data for bisphosphonate monotherapy, i.e. administration without another systemic therapy.

The efficacy of RANKL inhibitors, which are bone-modifying agents, is currently being examined in a prospective trial. The results from ABCSG-18 indicated the significantly prognostic efficacy (34) and prevention of bone fracture of adjuvant RANKL inhibitors (35). Guidelines for the most appropriate duration and adjuvant bisphosphonate agents are eagerly awaited.

### Neoadjuvant systemic therapy

Neoadjuvant chemotherapy (NAC) was mainly recommended for locally advanced BC without distant metastasis. Currently, the aims of NAC are dramatically changed according to current data of clinical trials (27,39). The purpose of NAC is not only increasing the breast-conserving surgery rate but also precision medicine (adjuvant capecitabine or T-DM1 for early BC with residual disease) according to efficacy of NAC.

Regimen selection aims to obtain the maximal anti-cancer effect according to cancer biology. Anti-HER2 drugs are used for HER2-positive BC patients (36). The response to NAC, especially a complete response (pCR), is a prognostic factor in patients who are ER-negative and/or HER2-positive. ER-positive postmenopausal BC patients are candidates for neoadjuvant hormone therapy. Prospective trials designed to evaluate the safety of foregoing surgery in patients with pCR in response to NAC are currently ongoing.

### Neoadjuvant chemotherapy

A meta-analysis confirmed that if patients use the same drugs, there is no difference in outcomes between adjuvant and neoadjuvant systemic therapies (37).

The breast-conserving rate in patients receiving NAC is better than that of those given adjuvant therapy. However, there is a report

describing a higher local recurrence rate in patients treated with NAC (38). The standard NAC regimen is AC followed by a taxane. Anti-HER2 drugs increase the pCR rate for HER2-positive patients (39). Notably, the combination of pertuzumab and trastuzumab exerts greater efficacy without severe adverse events (40). Carboplatin added to the standard regimen may be effective for triple negative BC patients, especially with BRCA1/2 mutation. It is anticipated that novel regimens, which use molecular target agents, chosen based on drug sensitivity predictions, will be developed in near future.

Future studies should focus on other molecular target drugs to determine their effects, when given as escalation therapy, in non-pCR patients.

### Neoadjuvant hormone therapy

Neoadjuvant hormone therapy increases the breast-conserving therapy rate for ER-positive postmenopausal BC patients (41). AI is used as neoadjuvant hormone therapy. The anti-cancer effects of neoadjuvant hormone therapy are similar to those of NAC (42). However, there is no evidence for the optimal duration of treatment or the long-term outcomes. Trials comparing NAC and hormone therapy showed breast-conserving rates to be similar, but there were fewer adverse events with hormone therapy than with NAC. AI is more effective than tamoxifen as neoadjuvant hormone therapy.

Neoadjuvant hormone therapy is not recommended to premenopausal patients because data supporting this option are lacking. Tamoxifen as neoadjuvant hormone therapy did not show efficacy similar to that of NAC. Tamoxifen with LH–RH agonist administration increases the breast-conserving rate. Neoadjuvant hormone therapy is increasingly being selected based on sensitivity to hormone therapy and facilitates deciding whether to administer adjuvant chemotherapy (43). The NEOS trial based their strategies for treating ER-positive postmenopausal patients on the response to 6-month neoadjuvant hormone therapy. There are other trials utilizing the Ki67 score after 2 weeks of neoadjuvant hormone therapy to determine whether adjuvant chemotherapy is warranted.

### Conclusion

The duration and regimens of adjuvant therapy have been changed according to evidences of clinical trials. The purpose of neoadjuvant

therapy has also changed for early BC. The shared decision-making is very important to determine the systemic therapy (on or off, adjuvant or neoadjuvant) for early BC with each subtype.

## Acknowledgements

This report was supported in part by the National Cancer Center Research and Development Fund (26-A-4) from the Ministry of Health, Labour and Welfare and the Practical Research for Innovative Cancer Control (19ck0106307h0002) from the Japan Agency for Medical Research and Development, AMED.

## Conflict of interest statement

Tadahiko Shien has no conflict of interest. Hiroji Iwata reports grants and personal fees from Chugai, personal fees from AstraZeneca, personal fees from Daiichi Sankyo, grants and personal fees from Novartis, grants from MSD, grants and personal fees from Lilly, personal fees from Kyowa Hakko Kirin and personal fees from Pfizer, during the conduct of the study.

## References

- Viale G, Regan MM, Mastropasqua MG, et al. International breast cancer study group. Predictive value of tumor Ki-67 expression in two randomized trials of adjuvant chemoendocrine therapy for node-negative breast cancer. *J Natl Cancer Inst* 2008;100:207–12.
- de Azambuja E, Cardoso F, de Castro G Jr, et al. Ki-67 as prognostic marker in early breast cancer: a meta-analysis of published studies involving 12,155 patients. *Br J Cancer* 2007;96:1504–13.
- Petrelli F, Viale G, Cabiddu M, et al. Prognostic value of different cut-off levels of Ki-67 in breast cancer: A systematic review and meta-analysis of 64,196 patients. *Breast Cancer Res Treat* 2015;153:477–91.
- Sparano JA, Gray RJ, Makower DF, et al. Prospective validation of a 21-gene expression assay in breast cancer. *N Engl J Med* 2015;373:2005–14.
- Dowsett M, Sestak I, Lopez-Knowles E, et al. Comparison of PAM50 risk of recurrence score with oncotype DX and IHC4 for predicting risk of distant recurrence after endocrine therapy. *J Clin Oncol* 2013;31:2783–90.
- Naoi Y, Kishi K, Tsunashima R, et al. Comparison of efficacy of 95-gene and 21-gene classifier (Oncotype DX) for prediction of recurrence in ER-positive and node-negative breast cancer patients. *Breast Cancer Res Treat* 2013;140:299–306.
- Early Breast Cancer Trialists' Collaborative Group (EBCTCG), Davies C, Godwin J, et al. Relevance of breast cancer hormone receptors and other factors to the efficacy of adjuvant tamoxifen: patient-level meta-analysis of randomised trials. *Lancet* 2011;378:771–84.
- Davies C, Pan H, Godwin J, et al. Adjuvant Tamoxifen: Longer against shorter (ATLAS) collaborative group. Long-term effects of continuing adjuvant tamoxifen to 10 years versus stopping at 5 years after diagnosis of oestrogen receptor-positive breast cancer: ATLAS, a randomised trial. *Lancet* 2013 Mar 9;381:805–16.
- Saha P, Regan MM, Pagani O, et al. SOFT; TEXT investigators; international breast cancer study group. Treatment efficacy, adherence, and quality of life among women younger than 35 years in the international breast cancer study group TEXT and SOFT adjuvant endocrine therapy trials. *J Clin Oncol* 2017;35:3113–22.
- Pagani O, Regan MM, Walley BA, et al. TEXT and SOFT investigators; international breast cancer study group. Adjuvant exemestane with ovarian suppression in premenopausal breast cancer. *N Engl J Med* 2014;371:107–18.
- Regan MM, Francis PA, Pagani O, et al. Absolute benefit of adjuvant endocrine therapies for premenopausal women with hormone receptor-positive, human epidermal growth factor receptor 2-negative early breast cancer: TEXT and SOFT trials. *J Clin Oncol* 2016;34:2221–31.
- Darby S, McGale P, Correa C, et al. Early breast cancer Trialists' collaborative group (EBCTCG). Effect of radiotherapy after breast-conserving surgery on 10-year recurrence and 15-year breast cancer death: Meta-analysis of individual patient data for 10,801 women in 17 randomised trials. *Lancet* 2011;378:1707–16.
- Cuzick J, Sestak I, Baum M, et al. ATAC/LATTE investigators. Effect of anastrozole and tamoxifen as adjuvant treatment for early-stage breast cancer: 10-year analysis of the ATAC trial. *Lancet Oncol* 2010;11:1135–41.
- Regan MM, Neven P, Giobbie-Hurder A, et al. BIG 1-98 collaborative group; international breast cancer study group (IBCSG). Assessment of letrozole and tamoxifen alone and in sequence for postmenopausal women with steroid hormone receptor-positive breast cancer: The BIG 1-98 randomised clinical trial at 8.1 years median follow-up. *Lancet Oncol* 2011;12:1101–8.
- Early Breast Cancer Trialists' Collaborative Group (EBCTCG). Aromatase inhibitors versus tamoxifen in early breast cancer: patient-level meta-analysis of the randomised trials. *Lancet* 2015;386:1341–52.
- Goss PE, Ingle JN, Pritchard KI, et al. Extending aromatase-inhibitor adjuvant therapy to 10 years. *N Engl J Med* 2016;375:209–19.
- Peto R, Davies C, Godwin J, et al. Early breast cancer Trialists' collaborative group (EBCTCG). Comparisons between different poly-chemotherapy regimens for early breast cancer: Meta-analyses of long-term outcome among 100,000 women in 123 randomised trials. *Lancet* 2012;379:432–44.
- Jones S, Holmes FA, O'Shaughnessy J, et al. Docetaxel with cyclophosphamide is associated with an overall survival benefit compared with doxorubicin and cyclophosphamide: 7-year follow-up of US oncology research trial 9735. *J Clin Oncol* 2009;27:1177–83.
- Blum JL, Flynn PJ, Yothers G, et al. Anthracyclines in early breast cancer: the ABC trials-USOR 06-090, NSABP B-46-I/USOR 07132, and NSABP B-49 (NRG oncology). *J Clin Oncol* 2017;35:2647–55.
- Venturini M, Del Mastro L, Aitini E, Baldini E, Caroti C, Contu A, et al. Dose-dense adjuvant chemotherapy in early breast cancer patients: Results from a randomized trial. *J Natl Cancer Inst* 2005;97:1724–33.
- Del Mastro L, De Placido S, Bruzzi P, et al. Gruppo Italiano Mammella (GIM) investigators. Fluorouracil and dose-dense chemotherapy in adjuvant treatment of patients with early-stage breast cancer: an open-label, 2×2 factorial, randomised phase 3 trial. *Lancet* 2015;385:1863–72.
- Masuda N, Lee SJ, Ohtani S, et al. Adjuvant Capecitabine for breast cancer after preoperative chemotherapy. *N Engl J Med* 2017 Jun 1;376:2147–59.
- Albain KS, Barlow WE, Shak S, et al. Breast cancer intergroup of North America. Prognostic and predictive value of the 21-gene recurrence score assay in postmenopausal women with node-positive, oestrogen-receptor-positive breast cancer on chemotherapy: a retrospective analysis of a randomised trial. *Lancet Oncol* 2010;11:55–65.
- Dowsett M, Sestak I, Lopez-Knowles E, et al. Comparison of PAM50 risk of recurrence score with oncotype DX and IHC4 for predicting risk of distant recurrence after endocrine therapy. *J Clin Oncol* 2013;31:2783–90.
- Naoi Y, Kishi K, Tanei T, et al. Development of 95-gene classifier as a powerful predictor of recurrences in node-negative and ER-positive breast cancer patients. *Breast Cancer Res Treat* 2011;128:633–41.
- Sparano JA, Gray RJ, Makower DF, et al. Prospective validation of a 21-gene expression assay in breast cancer. *N Engl J Med* 2015;373:2005–14.
- Slamon D, Eiermann W, Robert N, et al. Breast cancer international research group. Adjuvant trastuzumab in HER2-positive breast cancer. *N Engl J Med* 2011;365:1273–83.
- Tolaney SM, Barry WT, Dang CT, et al. Adjuvant paclitaxel and trastuzumab for node-negative, HER2-positive breast cancer. *N Engl J Med* 2015 Jan 8;372:134–41.
- Minckwits G, Procter M, Azambuja E, et al. Adjuvant pertuzumab and trastuzumab in early HER2-positive breast cancer. *N Engl J Med* 2017;377:702.
- Cameron D, Piccart-Gebhart MJ, Gelber RD, et al. Herceptin adjuvant (HERA) trial study team. 11 years' follow-up of trastuzumab after adjuvant chemotherapy in HER2-positive early breast cancer: Final analysis of the HERceptin adjuvant (HERA) trial. *Lancet* 2017;389:1195–205.

31. Pivrot X, Romieu G, Debled M, et al. PHARE trial investigators. 6 months versus 12 months of adjuvant trastuzumab for patients with HER2-positive early breast cancer (PHARE): a randomised phase 3 trial. *Lancet Oncol* 2013;14:741–8.
32. von Minckwitz G, Huang CS, Mano MS, et al. Trastuzumab Emtansine for residual invasive HER2-positive breast cancer. *N Engl J Med* 2019;380(7):617–628.
33. Early Breast Cancer Trialists' Collaborative Group (EBCTCG). Adjuvant bisphosphonate treatment in early breast cancer: meta-analyses of individual patient data from randomised trials. *Lancet* 2015;386:1353–61.
34. Gnant M, Pfeiler G, Steger GG, et al. Adjuvant denosumab in postmenopausal patients with hormone receptor-positive breast cancer (ABCSG-18): Disease-free survival results from a randomised, double-blind, placebo-controlled, phase 3 trial. *Lancet Oncol* 2019;20:339–51.
35. Gnant M, Pfeiler G, Dubsy PC, et al. Austrian breast and colorectal cancer study group. Adjuvant denosumab in breast cancer (ABCSG—18): a multicentre, randomised, double—Blind, placebo—Controlled trial. *Lancet* 2015;386:433–43.
36. Buzdar AU, Ibrahim NK, Francis D, et al. Significantly higher pathologic complete remission rate after neoadjuvant therapy with trastuzumab, paclitaxel, and epirubicin chemotherapy: Results of a randomized trial in human epidermal growth factor receptor 2-positive operable breast cancer. *J Clin Oncol* 2005;23:3676–85.
37. Mieog JS, van der Hage JA, van de Velde CJ. Preoperative chemotherapy for women with operable breast cancer. *Cochrane Database Syst Rev* 2007;CD005002.
38. Early Breast Cancer Trialists' Collaborative Group (EBCTCG). Long-term outcomes for neoadjuvant versus adjuvant chemotherapy in early breast cancer: meta-analysis of individual patient data from ten randomised trials. *Lancet Oncol* 2018;19:27–39.
39. von Minckwitz G, Untch M, Blohmer JU, et al. Definition and impact of pathologic complete response on prognosis after neoadjuvant chemotherapy in various intrinsic breast cancer subtypes. *J Clin Oncol* 2012;30:1796–804.
40. Gianni L, Pienkowski T, Im YH, et al. Efficacy and safety of neoadjuvant pertuzumab and trastuzumab in women with locally advanced, inflammatory, or early HER2-positive breast cancer (NeoSphere): a randomised multicentre, open-label, phase 2 trial. *Lancet Oncol* 2012;13:25–32.
41. Alba E, Calvo L, Albanell J, et al. GEICAM. Chemotherapy (CT) and hormonotherapy (HT) as neoadjuvant treatment in luminal breast cancer patients: results from the GEICAM/2006-03, a multicenter, randomized, phase-II study. *Ann Oncol* 2012;23:3069–74.
42. Smith IE, Dowsett M, Ebbs SR, et al. IMPACT Trialists group. Neoadjuvant treatment of postmenopausal breast cancer with anastrozole, tamoxifen, or both in combination: the immediate preoperative Anastrozole, Tamoxifen, or combined with Tamoxifen (IMPACT) multicenter double-blind randomized trial. *J Clin Oncol* 2005;23:5108–16.
43. Masuda N, Sagara Y, Kinoshita T, et al. Neoadjuvant anastrozole versus tamoxifen in patients receiving goserelin for premenopausal breast cancer (STAGE): a double-blind randomised phase 3 trial. *Lancet Oncol* 2012;13:345–52.
